# Supplementary material
Source: PubMed Central journal article supplement (PMC3169724)
Supplement: NIHMS297795-supplement-1.pdf [file NIHMS297795-supplement-1.pdf]

## Supplementary Information Titles

| <b>Journal:</b> Nature Medicine                                                                                                                                      |                                                                                                                                                                                                                                                                                                                                                                                                                                                                                                                                                                                                                                                                                                                                                                                                                                                                                                                                                                                                                                                                                                                                                                                                                     |
|----------------------------------------------------------------------------------------------------------------------------------------------------------------------|---------------------------------------------------------------------------------------------------------------------------------------------------------------------------------------------------------------------------------------------------------------------------------------------------------------------------------------------------------------------------------------------------------------------------------------------------------------------------------------------------------------------------------------------------------------------------------------------------------------------------------------------------------------------------------------------------------------------------------------------------------------------------------------------------------------------------------------------------------------------------------------------------------------------------------------------------------------------------------------------------------------------------------------------------------------------------------------------------------------------------------------------------------------------------------------------------------------------|
| <b>Article Title:</b>                                                                                                                                                | Oncogenic <i>PIK3CA</i> -driven mammary tumors frequently recur via PI3K pathway-dependent and -independent mechanisms                                                                                                                                                                                                                                                                                                                                                                                                                                                                                                                                                                                                                                                                                                                                                                                                                                                                                                                                                                                                                                                                                              |
| <b>Corresponding Author:</b>                                                                                                                                         | Jean J. Zhao ( <a href="mailto:jean_zhao@dfci.harvard.edu">jean_zhao@dfci.harvard.edu</a> )                                                                                                                                                                                                                                                                                                                                                                                                                                                                                                                                                                                                                                                                                                                                                                                                                                                                                                                                                                                                                                                                                                                         |
| Supplementary Item & Number                                                                                                                                          | Title or Caption                                                                                                                                                                                                                                                                                                                                                                                                                                                                                                                                                                                                                                                                                                                                                                                                                                                                                                                                                                                                                                                                                                                                                                                                    |
| Supplementary<br>Fig.1<br>Fig.2<br>Fig.3<br>Fig.4<br>Fig.5<br>Fig.6<br>Fig.7<br>Fig.8<br>Fig.9<br>Fig.10<br>Fig.11<br>Fig.12<br>Fig.13<br>Fig.14<br>Fig.15<br>Fig.16 | <p>Doxycycline-inducible expression of <i>PIK3CA</i><sup>H1047R</sup></p> <p>Analyses of early mammary cancer lesions</p> <p>The expression of <i>PIK3CA</i><sup>H1047R</sup> is suppressed following doxycycline withdrawal</p> <p>Tumor responses to doxycycline withdrawal</p> <p>Mouse SNP6.0 array analyses of mammary tumors</p> <p>Amplification of <i>c-Myc</i> in RCT-D419 and RCT-C658 tumors</p> <p>A fraction of recurrent tumors have increased <i>c-Myc</i> copy number</p> <p>A fraction of recurrent tumors have increased <i>c-Myc</i> mRNA expression</p> <p>A fraction of recurrent tumors have increased <i>c-Myc</i> protein</p> <p>Frequencies of <i>c-Myc</i> up-regulation in recurrent tumors</p> <p>A fraction of recurrent tumors have increased <i>c-Met</i> mRNA expression</p> <p>A fraction of recurrent tumors have increased <i>Mdm2</i> mRNA expression</p> <p>Increased <i>c-Met</i> expression in the RCT-E565 tumor</p> <p>Increased <i>c-Myc</i> expression in RCT-D419 and RCT-C658 tumors</p> <p>Overexpression of <i>c-Myc</i> renders tumors resistance to GDC-0941</p> <p>Co-occurrence of <i>PIK3CA</i> mutation with <i>c-MYC</i> elevation in human breast tumors</p> |
| Supplementary<br>Table 1<br>Table 2<br>Table 3                                                                                                                       | <p>A summary of primary tumors' histopathological phenotypes and their respective response following inactivation of <i>PIK3CA</i><sup>H1047R</sup></p> <p>A summary for recurrent tumors scored with increased expression levels of <i>c-Myc</i>, <i>c-Met</i> and <i>Mdm2</i></p> <p>Reverse-Phase Protein Array (RPPA) analysis of <i>c-MYC</i> protein levels for a cohort of breast tumor samples with annotated <i>PIK3CA</i> mutation status</p>                                                                                                                                                                                                                                                                                                                                                                                                                                                                                                                                                                                                                                                                                                                                                             |
| Supplementary<br>Methods                                                                                                                                             | Supplementary Methods                                                                                                                                                                                                                                                                                                                                                                                                                                                                                                                                                                                                                                                                                                                                                                                                                                                                                                                                                                                                                                                                                                                                                                                               |

**a**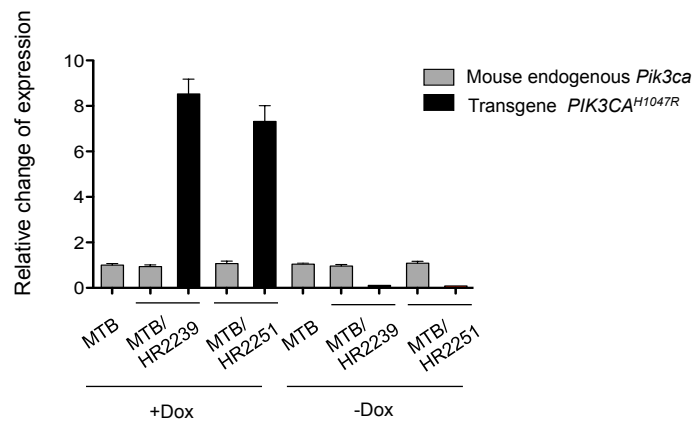**b**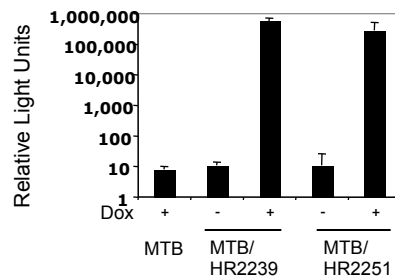

**Supplementary Fig. 1** Doxycycline-inducible expression of *PIK3CA<sup>H1047R</sup>*. (a) Quantitative reverse transcription polymerase chain reaction (qRT-PCR) analysis of *PIK3CA<sup>H1047R</sup>* Transgene expression and endogenous *Pik3ca* expression in mammary tissues isolated from MTB/HR-2239 and MTB/HR-2251 mice in the presence (+) or absence (-) of doxycycline. Mouse *Gapdh* was used as an endogenous control. The expression levels of transgene *PIK3CA<sup>H1047R</sup>* and endogenous *Pik3ca* in both bi-transgenic mouse lines were calculated relative to the endogenous *Pik3ca* expression in control mice (MTB). (b) Luciferase activity in mammary tissues isolated from MTB/HR-2239 and MTB/HR-2251 mice in the presence (+) or absence (-) of doxycycline.

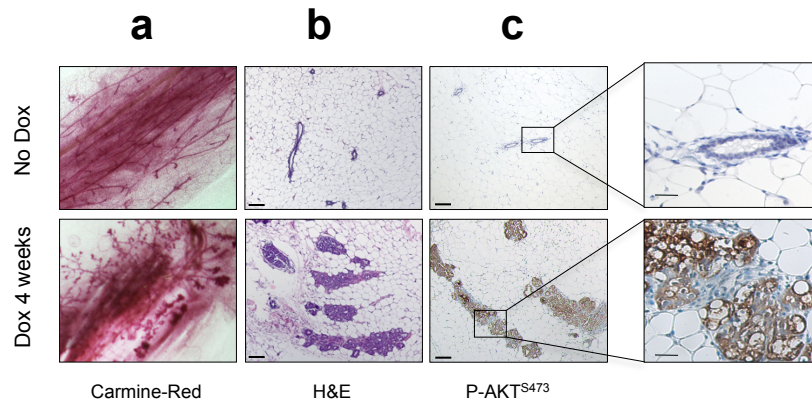

**Supplementary Fig. 2** Analyses of early mammary cancer lesions. A cohort of 8-week old  $iPIK3CA^{H1047R}$  females ( $n=5$ ) were treated with doxycycline for 4 weeks, and their mammary glands were harvested for analysis. Carmine-stained whole mounts (**a**), hematoxylin and eosin (H&E)-stained (**b**), and anti-phospho-AKT (Ser473) IHC sections (**c**) of mammary glands from  $iPIK3CA^{H1047R}$  female mice induced with doxycycline for 4 weeks (lower panels) or uninduced (No Dox, upper panels) as control. Scale bars,  $100\mu\text{m}$ . The insets are shown magnified, scale bars,  $25\mu\text{m}$ .

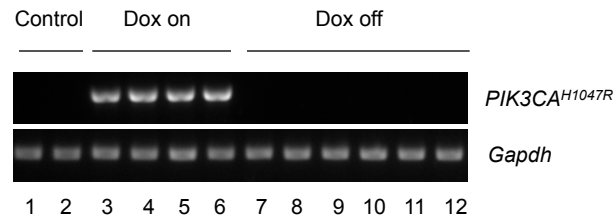

**Supplementary Fig. 3** The expression of *PIK3CA<sup>H1047R</sup>* is suppressed following doxycycline withdrawal. RNA samples were isolated from mammary tumors from mice maintained on doxycycline (lanes 3-6) or 6 days following doxycycline withdrawal (lanes 7-12). Samples isolated from mammary tissues of mice that had not been induced by doxycycline were used as controls (lanes 1 and 2). The levels of the *PIK3CA<sup>H1047R</sup>* transgene mRNA were determined by RT-PCR. *Gapdh* was used as a control.

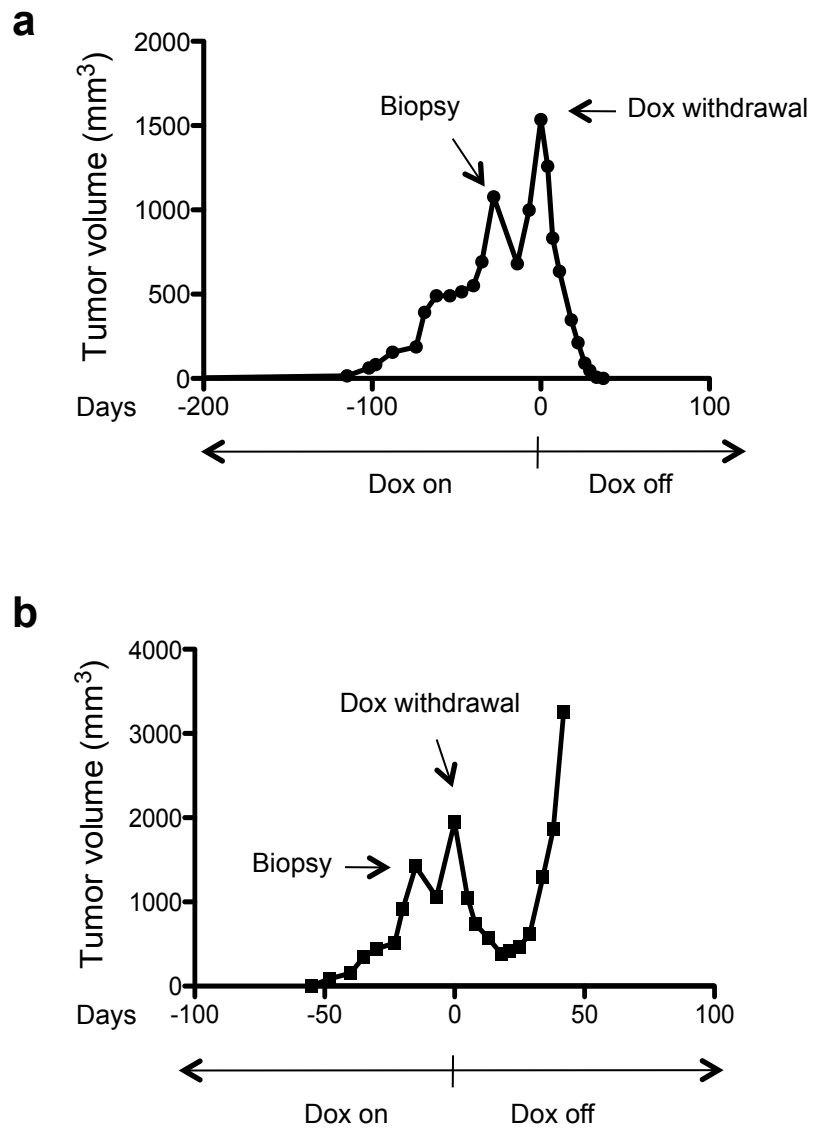

**Supplementary Fig. 4** Tumor responses to doxycycline withdrawal. Representative graphs showing tumor growth on doxycycline and regression to a completely tumor-free state following doxycycline withdrawal (**a**), or partial regression followed by subsequent re-growth in the absence of doxycycline (**b**).

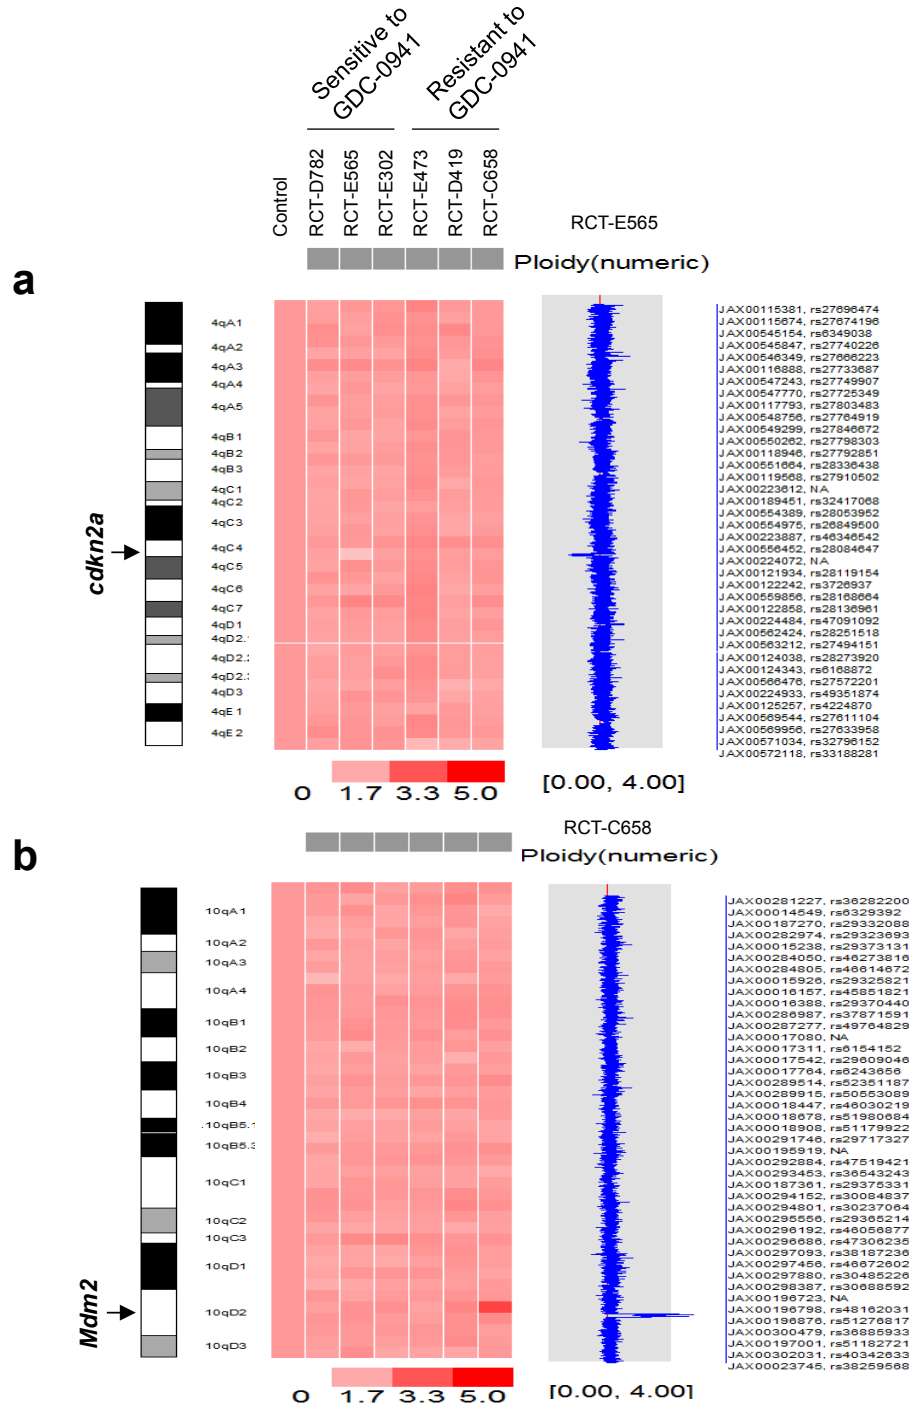

**Supplementary Fig. 5** Mouse SNP6.0 array analyses of mammary tumors. Mouse SNP6.0 array analyses of six *PIK3CA*<sup>H1047R</sup>-independent recurrent tumors identified a single copy loss in the *Cdkn2a* locus in RCT-E565 (a) and a focal amplification encompassing the *Mdm2* locus in RCT-C658 (b).

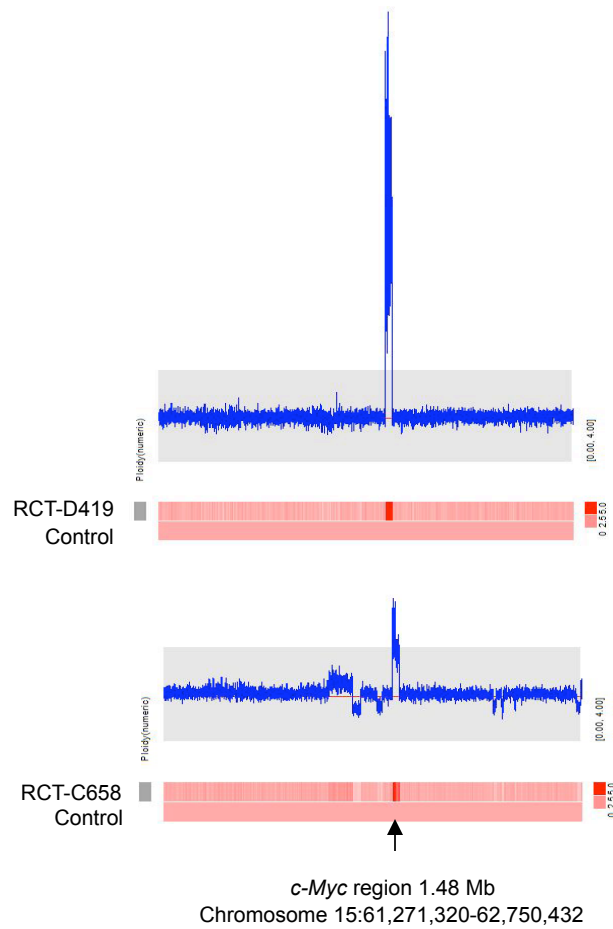

**Supplementary Fig. 6** Amplification of *c-Myc* in RCT-D419 and RCT-C658 tumors. Mouse SNP6.0 array analyses of *PIK3CA<sup>H1047R</sup>*-independent recurrent tumors, RCT-D419 and RCT-C658, demonstrating common focal amplification at the *c-Myc* locus.

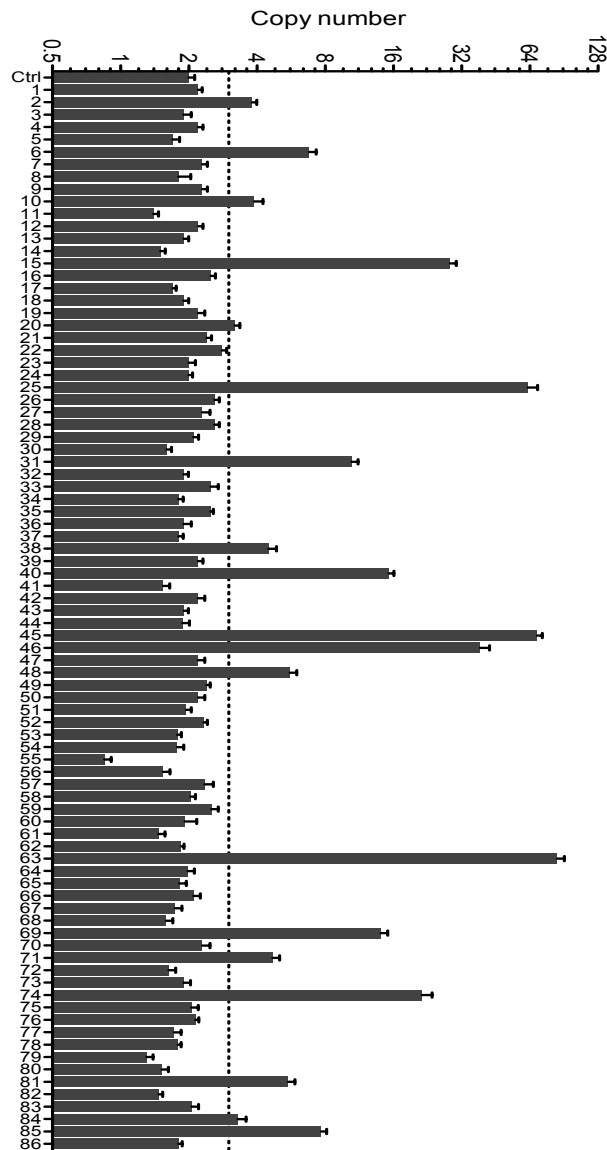

**Supplementary Fig. 7** A fraction of recurrent tumors have increased *c-Myc* copy number. Copy numbers of *c-Myc* were analyzed using quantitative PCR (qPCR) with genomic DNAs isolated from all 86 recurrent tumors collected. Genomic DNAs isolated from mammary gland tissues of iPIK3CA<sup>H1047R</sup> mice that had not been treated with doxycycline were used as a control (copy number =2). The dotted line indicates three copies. Results are shown as mean  $\pm$  SD of triplicate experiments. Mouse *Tfrc* was used as a reference control.



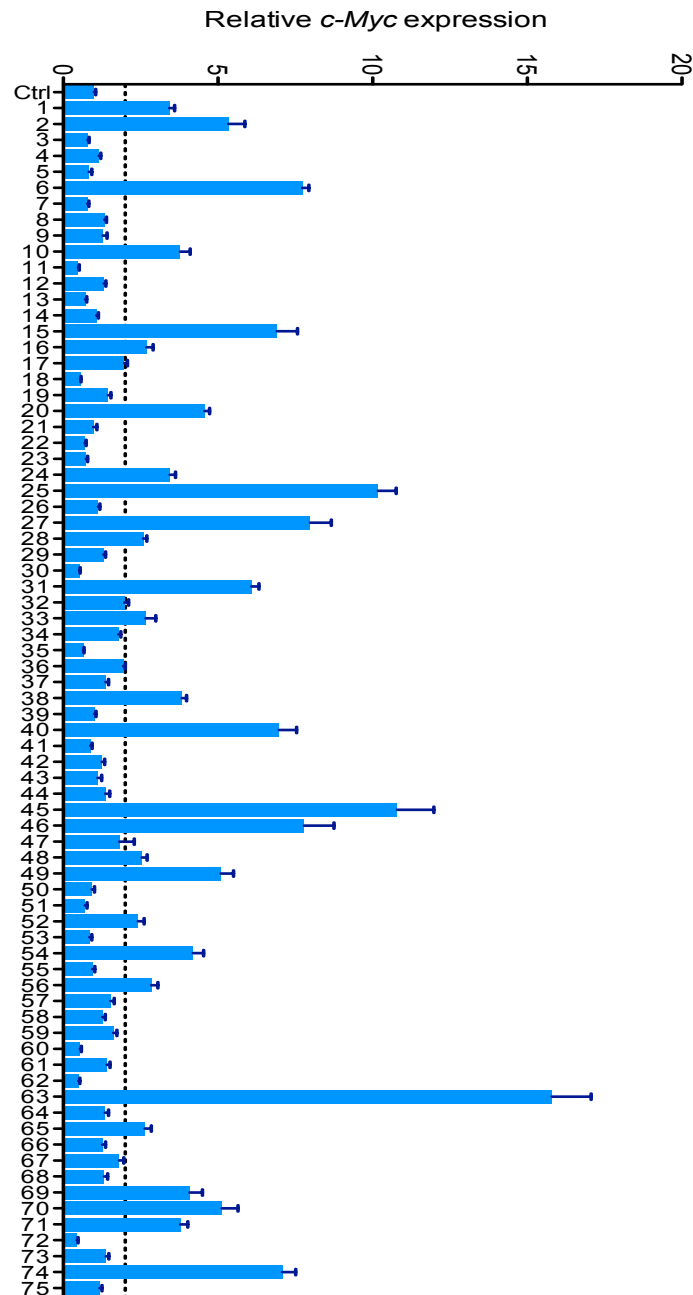

**Supplementary Fig. 8** A fraction of recurrent tumors have increased *c-Myc* mRNA expression. Expression levels of *c-Myc* in 75 of 86 recurrent tumors that yielded good quality RNAs were analyzed by qRT-PCR. RNAs isolated from mammary gland tissues in iPIK3CA<sup>H1047R</sup> mice that had not been treated with doxycycline were used as a control. The dotted line indicates the relative mRNA value at 2. Results are shown as mean  $\pm$  SD of triplicate experiments.

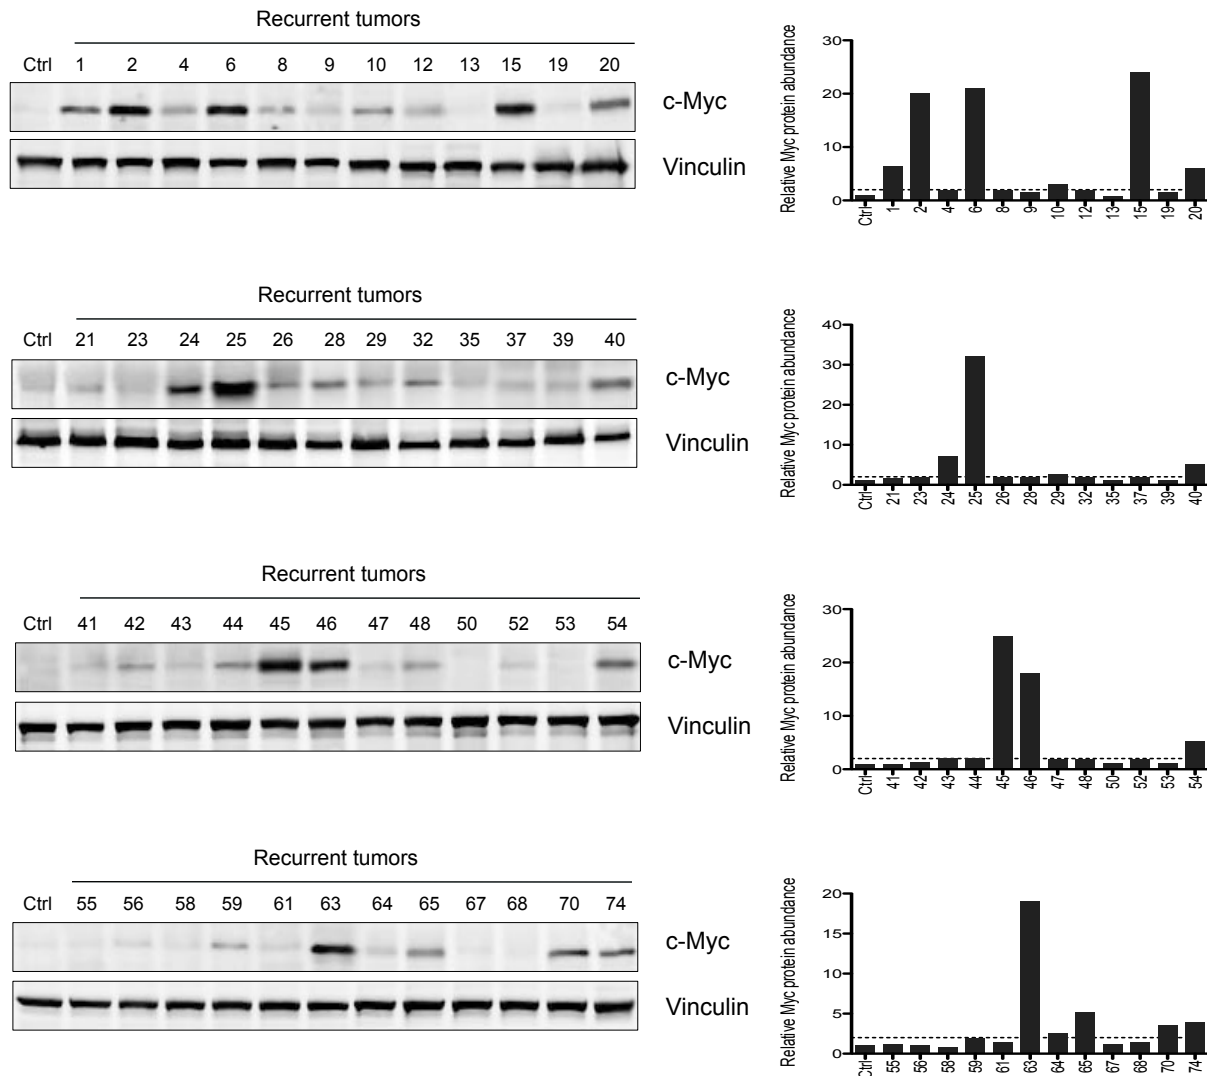

**Supplementary Fig. 9** A fraction of recurrent tumors have increased c-Myc protein. Protein levels of c-Myc in 48 out of 86 recurrent tumors that yielded sufficient tumor lysates were analyzed by Western blot analysis. Cell lysates isolated from mammary tissues of *iPIK3CA<sup>H1047R</sup>* mice that had not been treated with doxycycline were used as controls. Vinculin was used as a loading control. Bar graphs reflect mean values of relative c-Myc protein levels in recurrent tumors from two experiments. The dotted lines indicate a baseline of relative c-Myc protein level at 2.

**a**

| <b>c-Myc status in recurrent tumors</b> | <b>Frequency</b> |
|-----------------------------------------|------------------|
| Increased copy number                   | 19/86 (22%)      |
| Increased mRNA expression               | 28/75 (37%)      |
| Increased protein abundance             | 17/48 (35%)      |

**b**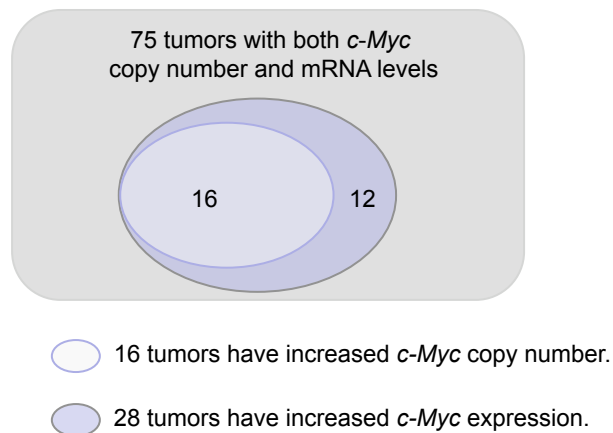**c**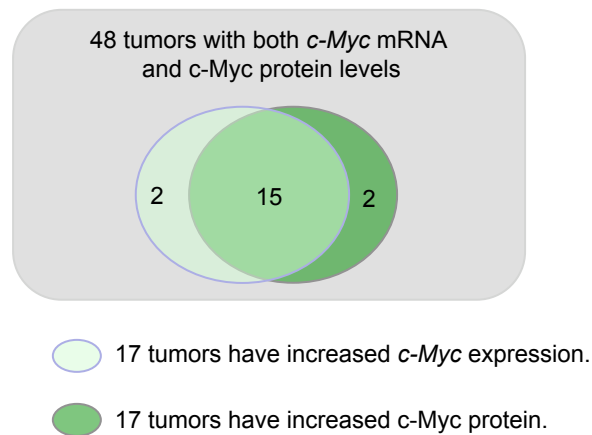

**Supplementary Fig. 10 Frequencies of c-Myc up-regulation in recurrent tumors.** (a) Frequencies of increased *c-Myc* at copy number, mRNA expression and protein levels in recurrent tumors are summarized. (b) All the tumors with increased *c-Myc* copy number also have increased *c-Myc* mRNA expression. The frequency of increased *c-Myc* mRNA expression (28/75, 36%) in recurrent tumors is higher than that of *c-Myc* amplification (16/75, 21%) ( $P = 0.048$ , Fisher's exact test). (c) Of the 48 tumors examined by western blot analysis, 17 have increased *c-Myc* protein levels and 15 of these are correlated with increased *c-Myc* mRNA expression levels.

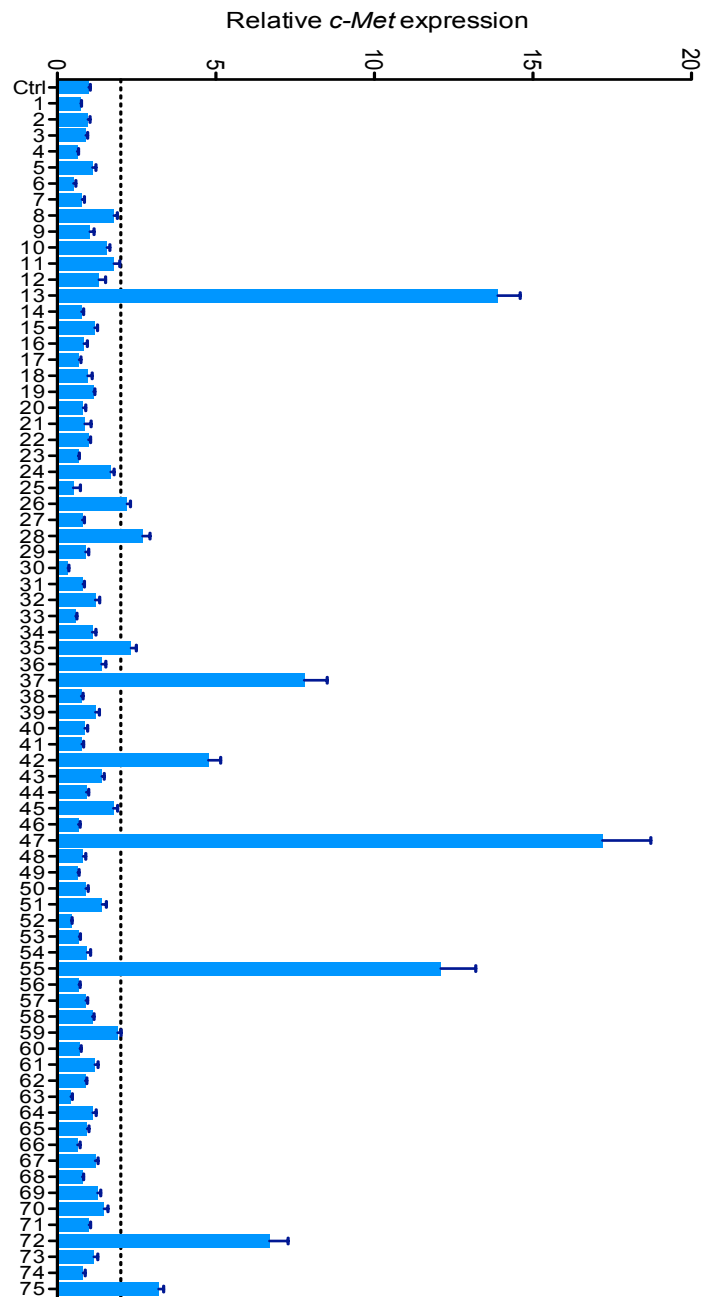

**Supplementary Fig. 11** A fraction of recurrent tumors have increased *c-Met* mRNA expression. Expression levels of *c-Met* in 75 of 86 recurrent tumors that yielded good quality RNAs were analyzed by qRT-PCR. RNAs isolated from mammary gland tissues in iPIK3CA<sup>H1047R</sup> mice that had not been treated with doxycycline were used as a control. The dotted line indicates the relative mRNA value at 2. Results are shown as mean  $\pm$  SD of triplicate experiments.

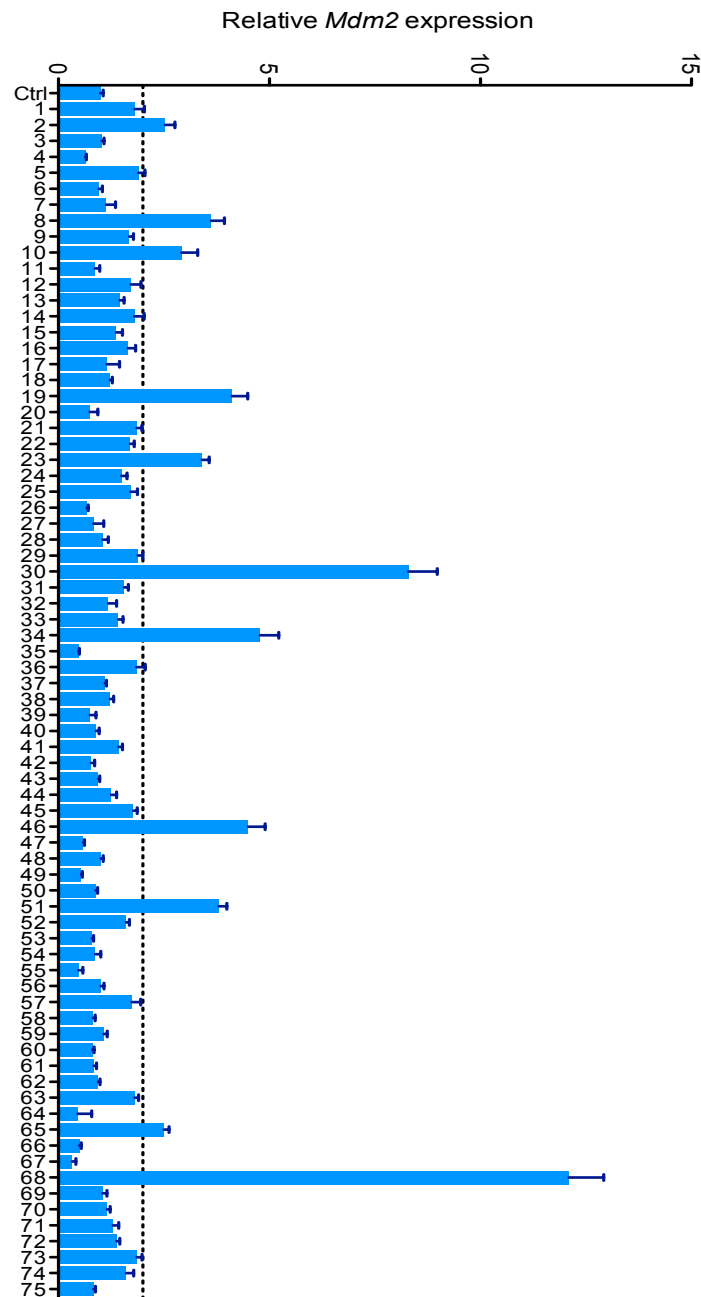

**Supplementary Fig. 12** A fraction of recurrent tumors have increased *Mdm2* mRNA expression. Expression levels of *Mdm2* in 75 of 86 recurrent tumors that yielded good quality RNAs were analyzed by qRT-PCR. RNAs isolated from mammary gland tissues in iPIK3CA<sup>H1047R</sup> mice that had not been treated with doxycycline were used as a control. The dotted line indicates the relative mRNA value at 2. Results are shown as mean  $\pm$  SD of triplicate experiments.

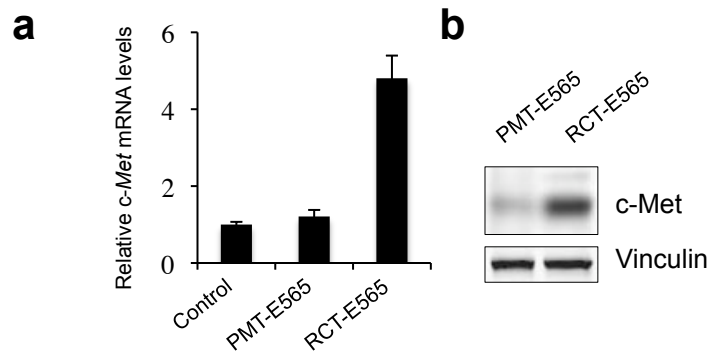

**Supplementary Fig. 13** Increased c-Met expression in the RCT-E565 tumor. **(a)** qRT-PCR analysis of *c-Met* expression in RCT-E565 and its respective tumor biopsy obtained before doxycycline withdrawal (PMT-E565). **(b)** Western blot analysis of c-Met levels in PMT-E565 and RCT-E565 tumor samples. Vinculin was used as a loading control.

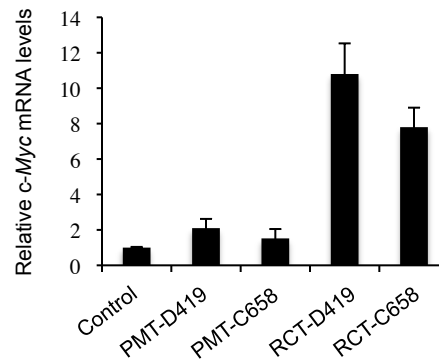

**Supplementary Fig. 14** Increased *c-Myc* expression in RCT-D419 and RCT-C658 tumors. qRT-PCR analysis of *c-Myc* expression in RCT-D419 and RCT-C658 and their respective tumor biopsies, PMT-D419 and PMT-C658, obtained before doxycycline withdrawal as indicated. Uninduced normal mammary tissues were used as a control. Results are shown as mean  $\pm$  SD of triplicate experiments.

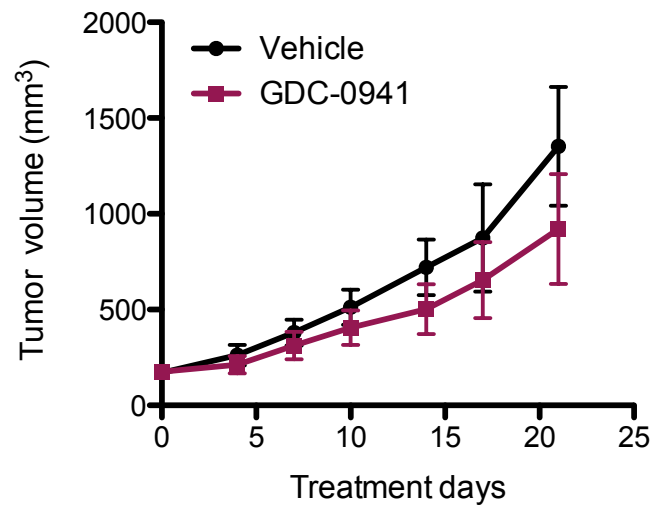

**Supplementary Fig. 15** Overexpression of c-Myc renders tumors resistance to GDC-0941. Mice bearing D777-Myc(WT) tumors were treated with either GDC-0941 (120 mg/kg/day) or vehicle and tumor growth followed. Data are shown as mean  $\pm$  S.E.M ( $n = 6$ ).



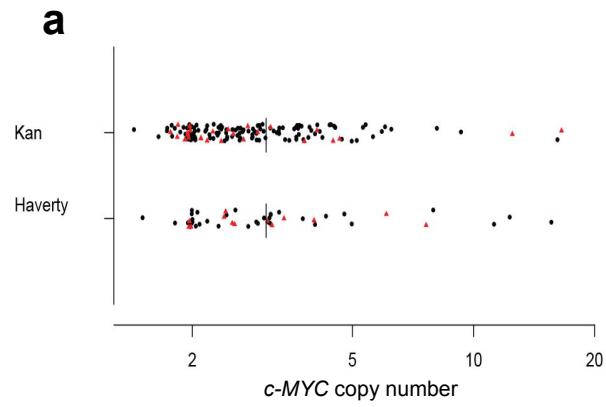

| Breast cancer dataset | Number of tumors | Proportion <i>PIK3CA</i> mut | Proportion of <i>PIK3CA</i> mut tumors with <i>MYC</i> copy number > 3 |
|-----------------------|------------------|------------------------------|------------------------------------------------------------------------|
| Kan et al             | 145              | 26/145 (18%)                 | 7/26 (27%)                                                             |
| Haverty et al         | 51               | 13/51 (26%)                  | 6/13 (46%)                                                             |

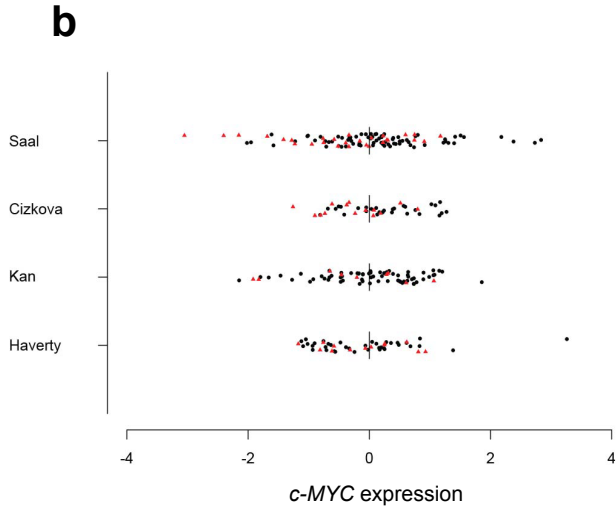

| Breast cancer dataset | Number of tumors | Proportion <i>PIK3CA</i> mut | Proportion of <i>PIK3CA</i> mut tumors with <i>MYC</i> expression > mean level |
|-----------------------|------------------|------------------------------|--------------------------------------------------------------------------------|
| Saal et al            | 104              | 28/104 (27%)                 | 10/28 (36%)                                                                    |
| Cizkova et al         | 44               | 15/44 (34%)                  | 5/15 (33%)                                                                     |
| Kan et al             | 76               | 9/76 (12%)                   | 4/9 (44%)                                                                      |
| Haverty et al         | 51               | 13/51 (26%)                  | 6/13 (46%)                                                                     |

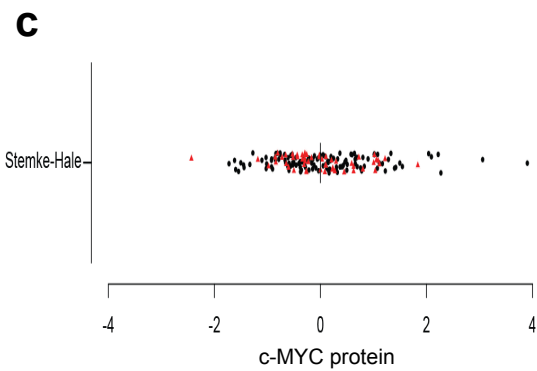

| Breast cancer dataset | Number of tumors | Proportion <i>PIK3CA</i> mut | Proportion of <i>PIK3CA</i> mut tumors with <i>MYC</i> protein > mean level |
|-----------------------|------------------|------------------------------|-----------------------------------------------------------------------------|
| Stemke-Hale et al     | 179              | 53/179 (30%)                 | 25/53 (47%)                                                                 |

**Supplementary Fig. 16** Co-occurrence of PIK3CA mutation with c-MYC elevation in human breast tumors. (a) Distribution and summary table of copy numbers at the *c-MYC* locus in *PIK3CA* mutant and *PIK3CA* wild-type breast tumors in two independent cohorts for which these data are available. The black lines indicate three copies. (b) Distribution and summary table of *c-MYC* expression levels for *PIK3CA* mutant and wild type tumors (presented as in panel a) in four independent cohorts of breast tumors for which these data are available. The black lines indicate the mean value for each cohort, which was normalized to zero. Outliers with *c-MYC* gene expression  $> \pm 4SD$  from mean were excluded from the plot. (c) Distribution and summary table of c-MYC protein expression in *PIK3CA* mutant and wild-type breast tumors (presented as in panel a) in a cohort for which these data are available. c-MYC protein levels were determined by RPPA (reverse phase protein array). The black lines indicate the mean value for each cohort, which was normalized to zero. *PIK3CA* mutant, red triangles; *PIK3CA* wild-type, black dots.

| Pathology           | Response following inactivation of <i>PIK3CA</i> <sup>H1047R</sup> |             |              |
|---------------------|--------------------------------------------------------------------|-------------|--------------|
|                     | Fully regressed                                                    | Recurred    | Subtotal     |
| Solid*              | 30% (8/27)                                                         | 70% (19/27) | 33% (27/83)  |
| Acinar              | 71% (5/7)                                                          | 29% (2/7)   | 8% (7/83)    |
| Glandular           | 25% (1/4)                                                          | 75% (3/4)   | 5% (4/83)    |
| Papillary           | 50% (5/10)                                                         | 50% (5/10)  | 12% (10/83)  |
| Squamous metaplasia | 42% (5/12)                                                         | 58% (7/12)  | 15% (12/83)  |
| Mixed               | 43% (10/23)                                                        | 57% (13/23) | 28% (23/83)  |
| Total               | 39% (32/83)                                                        | 61% (51/83) | 100% (83/83) |

**Supplementary Table 1.** A summary of primary tumors' histopathological phenotypes and their respective response following inactivation of *PIK3CA*<sup>H1047R</sup>. "Solid" tumors seem to be more likely to develop resistance following inhibition of the oncogenic *PIK3CA* (regressed tumors vs. recurrent tumors were analyzed by Fisher's exact test, \**P* = 0.006). While 71% (5/7) "acinar" tumors fully regressed and 75% (3/4) "glandular" tumors recurred, the correlation between the tumor histology and response to the inactivation of *PIK3CA*<sup>H1047R</sup> cannot be established with sufficient statistical power due to the small sample sizes. There was no correlation found in tumors displaying other pathological phenotypes with their response to *PIK3CA*<sup>H1047R</sup> inactivation.

| Tumor ID         | <i>c-Myc</i>       | <i>c-Met</i>       | <i>Mdm2</i>       |
|------------------|--------------------|--------------------|-------------------|
| 1                | +                  |                    |                   |
| 2                | +                  |                    | +                 |
| 3                |                    |                    |                   |
| 4                |                    |                    |                   |
| 5                |                    |                    |                   |
| 6                | +                  |                    |                   |
| 7                |                    |                    |                   |
| 8                |                    |                    | +                 |
| 9                |                    |                    |                   |
| 10               | +                  |                    | +                 |
| 11               |                    |                    |                   |
| 12               |                    |                    |                   |
| 13               |                    | +                  |                   |
| 14               |                    |                    |                   |
| 15               | +                  |                    |                   |
| 16               | +                  |                    |                   |
| 17               |                    |                    |                   |
| 18               |                    |                    |                   |
| 19               |                    |                    | +                 |
| 20               | +                  |                    |                   |
| 21               |                    |                    |                   |
| 22               |                    |                    |                   |
| 23               |                    |                    | +                 |
| 24               | +                  |                    |                   |
| 25               | +                  |                    |                   |
| 26               |                    | +                  |                   |
| 27               | +                  |                    |                   |
| 28               | +                  | +                  |                   |
| 29               |                    |                    |                   |
| 30               |                    |                    | +                 |
| 31               | +                  |                    |                   |
| 32               |                    |                    |                   |
| 33               | +                  |                    |                   |
| 34               |                    |                    | +                 |
| 35               |                    | +                  |                   |
| 36               |                    |                    |                   |
| 37               |                    | +                  |                   |
| 38               | +                  |                    |                   |
| 39               |                    |                    |                   |
| 40               | +                  |                    |                   |
| 41               |                    |                    |                   |
| 42               |                    | +                  |                   |
| 43               |                    |                    |                   |
| 44               |                    |                    |                   |
| 45               | +                  |                    |                   |
| 46               | +                  |                    | +                 |
| 47               |                    | +                  |                   |
| 48               | +                  |                    |                   |
| 49               | +                  |                    |                   |
| 50               |                    |                    |                   |
| 51               |                    |                    | +                 |
| 52               | +                  |                    |                   |
| 53               |                    |                    |                   |
| 54               | +                  |                    |                   |
| 55               |                    | +                  |                   |
| 56               | +                  |                    |                   |
| 57               |                    |                    |                   |
| 58               |                    |                    |                   |
| 59               |                    |                    |                   |
| 60               |                    |                    |                   |
| 61               |                    |                    |                   |
| 62               |                    |                    |                   |
| 63               | +                  |                    |                   |
| 64               |                    |                    |                   |
| 65               | +                  |                    | +                 |
| 66               |                    |                    |                   |
| 67               |                    |                    |                   |
| 68               |                    |                    | +                 |
| 69               | +                  |                    |                   |
| 70               | +                  |                    |                   |
| 71               | +                  |                    |                   |
| 72               |                    | +                  |                   |
| 73               |                    |                    |                   |
| 74               | +                  |                    |                   |
| 75               |                    | +                  |                   |
| <b>Frequency</b> | <b>37% (28/75)</b> | <b>13% (10/75)</b> | <b>15%(11/75)</b> |

**Supplementary Table 2.** A summary for recurrent tumors scored with increased expression levels of *c-Myc*, *c-Met* and *Mdm2*. Positive (+) represents a tumor sample having a relative expression level for *c-Myc*, *c-Met* or *Mdm2* two fold higher than normal controls as shown in Supplementary Figures 8, 11 and 12, respectively. Increased expression of *c-Myc* is seen in 28 of 75 (37%) recurrent tumors, which is significantly more frequent than increased expression levels of *c-Met* (13%,  $P = 0.0012$ , Fisher's exact test), and *Mdm2* (15%,  $P = 0.0026$ , Fisher's exact test).

| Patient ID | PIK3CA Mutation status     | c-MYC.txt    |  | Patient ID | PIK3CA Mutation status | c-MYC.txt    |  | Patient ID | PIK3CA Mutation status | c-MYC.txt    |
|------------|----------------------------|--------------|--|------------|------------------------|--------------|--|------------|------------------------|--------------|
| 2976       | PIK3CA E418K               | -3.420004828 |  | 3067       | WT                     | -4.157231292 |  | 1388       | WT                     | -3.497497193 |
| 4877       | PIK3CA E545K               | -3.876099221 |  | 3044       | WT                     | -4.108894749 |  | 1188       | WT                     | -3.496686888 |
| 3969       | PIK3CA E545K               | -3.809618933 |  | 2043       | WT                     | -4.083818388 |  | 2956       | WT                     | -3.485117591 |
| 2917       | PIK3CA E545K               | -3.747966038 |  | 1576       | WT                     | -4.008039293 |  | 4561       | WT                     | -3.477370405 |
| 3552       | PIK3CA E545K               | -3.741051472 |  | 1229       | WT                     | -3.973876172 |  | 4082       | WT                     | -3.476280592 |
| 1253       | PIK3CA E545K               | -3.670196556 |  | 7333       | WT                     | -3.972801477 |  | 3287       | WT                     | -3.465608694 |
| 1202       | PIK3CA E545K               | -3.651609314 |  | 7222       | WT                     | -3.968847901 |  | 1172       | WT                     | -3.458410879 |
| 4226       | PIK3CA E545K               | -3.476285902 |  | 1385       | WT                     | -3.928124991 |  | 2833       | WT                     | -3.454156349 |
| 665        | PIK3CA E545K               | -3.426982732 |  | 230        | WT                     | -3.92756436  |  | 663        | WT                     | -3.451957867 |
| 3871       | PIK3CA E545K               | -3.320903612 |  | 3818       | WT                     | -3.926773254 |  | 6995       | WT                     | -3.447077745 |
| 1359       | PIK3CA E545K               | -3.165086945 |  | 3247       | WT                     | -3.919089133 |  | 432        | WT                     | -3.441108565 |
| 1580       | PIK3CA E545K               | -3.074691352 |  | 2127       | WT                     | -3.898288809 |  | 4077       | WT                     | -3.434535192 |
| 4255       | PIK3CA E545K               | -3.068736297 |  | 3354       | WT                     | -3.89479672  |  | 7685       | WT                     | -3.431155958 |
| 953        | PIK3CA E545K               | -3.037556221 |  | 1382       | WT                     | -3.891890991 |  | 201        | WT                     | -3.409626538 |
| 702        | PIK3CA E545K               | -3.02608429  |  | 3819       | WT                     | -3.879407725 |  | 5328       | WT                     | -3.386984026 |
| 4276       | PIK3CA E545K/PIK3CA E418K  | -3.258526787 |  | 4936       | WT                     | -3.867360384 |  | 3122       | WT                     | -3.386012791 |
| 3102       | PIK3CA H1047R              | -4.597086988 |  | 2966       | WT                     | -3.857368736 |  | 1025       | WT                     | -3.378254469 |
| 1386       | PIK3CA H1047R              | -4.042197155 |  | 7178       | WT                     | -3.856087152 |  | 4197       | WT                     | -3.37567469  |
| 4360       | PIK3CA H1047R              | -3.952784031 |  | 3926       | WT                     | -3.818686141 |  | 7029       | WT                     | -3.356948816 |
| 3973       | PIK3CA H1047R              | -3.896780459 |  | 70         | WT                     | -3.814808445 |  | 3049       | WT                     | -3.356142712 |
| 1450       | PIK3CA H1047R              | -3.891938914 |  | 1556       | WT                     | -3.810481267 |  | 138        | WT                     | -3.346374174 |
| 2177       | PIK3CA H1047R              | -3.839816517 |  | 1575       | WT                     | -3.791809468 |  | 1328       | WT                     | -3.335629506 |
| 1179       | PIK3CA H1047R              | -3.805187045 |  | 4013       | WT                     | -3.789339344 |  | 3379       | WT                     | -3.328380922 |
| 7207       | PIK3CA H1047R              | -3.785937307 |  | 7002       | WT                     | -3.782094319 |  | 6576       | WT                     | -3.314523983 |
| 2902       | PIK3CA H1047R              | -3.752671044 |  | 4740       | WT                     | -3.781536689 |  | 1674       | WT                     | -3.306363582 |
| 1341       | PIK3CA H1047R              | -3.713200593 |  | 4043       | WT                     | -3.768330861 |  | 4980       | WT                     | -3.298910641 |
| 3137       | PIK3CA H1047R              | -3.671303162 |  | 1752       | WT                     | -3.766335    |  | 1249       | WT                     | -3.295390818 |
| 858        | PIK3CA H1047R              | -3.656098973 |  | 1327       | WT                     | -3.75265474  |  | 2719       | WT                     | -3.263977737 |
| 4400       | PIK3CA H1047R              | -3.648945565 |  | 7195       | WT                     | -3.751511698 |  | 7268       | WT                     | -3.255103971 |
| 1183       | PIK3CA H1047R              | -3.647630834 |  | 1342       | WT                     | -3.749278825 |  | 7707       | WT                     | -3.23533579  |
| 3133       | PIK3CA H1047R              | -3.637861527 |  | 4078       | WT                     | -3.742585256 |  | 1680       | WT                     | -3.22963483  |
| 2886       | PIK3CA H1047R              | -3.635683444 |  | 3131       | WT                     | -3.72416371  |  | 1162       | WT                     | -3.228099405 |
| 3755       | PIK3CA H1047R              | -3.633896844 |  | 3229       | WT                     | -3.722574233 |  | 1877       | WT                     | -3.221786476 |
| 5407       | PIK3CA H1047R              | -3.620698893 |  | 660        | WT                     | -3.69933605  |  | 3545       | WT                     | -3.214370476 |
| 4977       | PIK3CA H1047R              | -3.594239755 |  | 3641       | WT                     | -3.691392581 |  | 3773       | WT                     | -3.211876318 |
| 1343       | PIK3CA H1047R              | -3.528465596 |  | 3797       | WT                     | -3.68896346  |  | 3237       | WT                     | -3.183472399 |
| 1191       | PIK3CA H1047R              | -3.528138963 |  | 7267       | WT                     | -3.688019709 |  | 3912       | WT                     | -3.175233205 |
| 7003       | PIK3CA H1047R              | -3.518689085 |  | 4101       | WT                     | -3.685212057 |  | 1250       | WT                     | -3.164742188 |
| 333        | PIK3CA H1047R              | -3.505950494 |  | 4376       | WT                     | -3.68389676  |  | 4536       | WT                     | -3.153060859 |
| 3649       | PIK3CA H1047R              | -3.482302675 |  | 1446       | WT                     | -3.678458185 |  | 374        | WT                     | -3.121493573 |
| 2500       | PIK3CA H1047R              | -3.474172366 |  | 3394       | WT                     | -3.674039582 |  | 1440       | WT                     | -3.06986259  |
| 1246       | PIK3CA H1047R              | -3.472941172 |  | 3351       | WT                     | -3.661197578 |  | 4640       | WT                     | -3.06892976  |
| 128        | PIK3CA H1047R              | -3.398987123 |  | 1238       | WT                     | -3.651993793 |  | 5047       | WT                     | -3.043657759 |
| 3928       | PIK3CA H1047R              | -3.389018818 |  | 1908       | WT                     | -3.649164619 |  | 1030       | WT                     | -3.041306836 |
| 4381       | PIK3CA H1047R              | -3.242833176 |  | 654        | WT                     | -3.644300206 |  | 2738       | WT                     | -3.028199647 |
| 2790       | PIK3CA H1047R              | -3.242606377 |  | 1332       | WT                     | -3.62647911  |  | 2458       | WT                     | -3.001607567 |
| 4894       | PIK3CA H1047R              | -3.198594833 |  | 2517       | WT                     | -3.619144504 |  | 4453       | WT                     | -2.977203662 |
| 1651       | PIK3CA H1047R              | -3.061275813 |  | 4421       | WT                     | -3.615515568 |  | 3896       | WT                     | -2.951557291 |
| 1460       | PIK3CA H1047R              | -3.052068185 |  | 2377       | WT                     | -3.611342842 |  | 6315       | WT                     | -2.930819908 |
| 189        | PIK3CA H1047R              | -2.979566525 |  | 4334       | WT                     | -3.593236002 |  | 2208       | WT                     | -2.900506837 |
| 4299       | PIK3CA H1047R              | -2.706043038 |  | 3083       | WT                     | -3.590439793 |  | 1525       | WT                     | -2.890165677 |
| 3731       | PIK3CA H1047R/PIK3CA K111N | -3.41586907  |  | 2712       | WT                     | -3.584821823 |  | 982        | WT                     | -2.856414    |
| 1581       | PIK3CA N345K               | -3.711899822 |  | 4042       | WT                     | -3.582789469 |  | 1523       | WT                     | -2.83460463  |
| 7074       | WT                         | -6.222115769 |  | 1646       | WT                     | -3.573476775 |  | 3230       | WT                     | -2.615669291 |
| 4425       | WT                         | -4.283108827 |  | 4336       | WT                     | -3.569554421 |  | 2773       | WT                     | -2.592506423 |
| 3910       | WT                         | -4.236606274 |  | 844        | WT                     | -3.557154171 |  | 3904       | WT                     | -2.535661361 |
| 4256       | WT                         | -4.227384884 |  | 4444       | WT                     | -3.545620421 |  | 4209       | WT                     | -2.513167158 |
| 3399       | WT                         | -4.203168905 |  | 1251       | WT                     | -3.537184942 |  | 1302       | WT                     | -2.164405169 |
| 2600       | WT                         | -4.184640706 |  | 2605       | WT                     | -3.534614829 |  | 2948       | WT                     | -1.791293994 |
| 4188       | WT                         | -4.160972808 |  | 265        | WT                     | -3.521064939 |  |            |                        |              |

**Supplementary Table 3.** Reverse-Phase Protein Array (RPPA) analysis of c-MYC protein levels for a cohort of breast tumor samples with annotated *PIK3CA* mutation status.

## Supplementary Methods

**Luciferase activity assay.** Snap-frozen mammary tissues were homogenized in 1X Reporter Lysis buffer (Promega). The lysates were cleared by centrifugation and analyzed using the Luciferase Assay System (Promega) on a Lumat LB 9507, following the manufacturer's instructions. We performed assays in triplicate and normalized relative light units to total protein levels.

**Whole mounts, histology.** The 4th mammary glands were mounted on glass slides, fixed overnight in glacial acetic acid/ethanol solution and transferred to 70% ethanol. The mounted slides were then rinsed in water and stained in a filtered solution of carmine/aluminum potassium sulfate. Glands were then dehydrated sequentially through 70%, 95%, and 100% ethanol for 20 min each, then defatted in toluene and stored in methyl salicylate.

**Reverse transcription polymerase chain reaction (RT-PCR).** Total RNAs from mammary tumors or normal mammary tissues were isolated using an Allprep DNA/RNA Mini Kit (Qiagen) and used to synthesize cDNAs with a High Capacity RNA-to-cDNA kit (Applied Biosystems). Quantitative PCR was performed with Taqman gene expression assays (Applied Biosystems). Human *PIK3CA*<sup>H1047R</sup> and mouse *c-Myc*, *Pik3ca*, *c-Met*, *Mdm2* and *Gapdh* (as an endogenous control) were amplified with commercially designed Taqman gene expression assays (Applied Biosystems) and the Taqman gene expression master mix (Applied Biosystems). Quantitative expression data were acquired and analyzed with a 7300 Real-time PCR System (Applied Biosystems).

**DNA copy number analysis.** The relative copy number for *Myc* was determined by quantitative real time PCR using TaqMan Copy Number Assays (Applied Biosystems) and normalized to mouse endogenous reference gene *Tfrc* (Applied Biosystems, TaqMan Copy Number Reference Assay). All samples were analyzed in triplicate. Quantitative expression data were acquired and analyzed with a 7300 Real-time PCR System (Applied Biosystems).

## Description of human breast cancer datasets

### Cizkova M et al. (REF.18)

Expression levels of 43 ER-positive breast tumors from postmenopausal women at Rene Huguenin Hospital (Saint-Cloud, France) were profiled using Affymetrix microarrays. *PIK3CA* mutations of these tumors were detected by sequencing of RT-PCR products amplified from exons 9 and 20 and their flanking exons.

### Kan et al. (REF. 19)

145 breast tumors and matched normal samples obtained from multiple commercial vendors were scanned for *PIK3CA* mutations using *Escherichia coli*-based mismatch repair detection. DNA copy number was assessed in 145 breast tumor samples using the Agilent 244K CGH array. Expression profile analysis was performed on RNA derived from 76 breast tumors using the Affymetrix Exon 1.0ST array.

Haverty PM et al. (REF. 20)

51 breast tumor samples in this cohort were profiled for copy number alterations with the Affymetrix 500K SNP array. These tumors were sequenced for mutations in selected genes commonly mutated in breast cancer including *PIK3CA*. The expression levels of these tumors and 22 normal breast samples were profiled using Affymetrix U113A and B microarrays.

Saal, et al. (REF. 21)

104 breast cancer tumor samples in this cohort were sequenced for *PIK3CA* mutations and analyzed on 2-color cDNA microarrays using the Stratagene Universal Human Reference RNA as the common reference sample.

Stemle-Hale et al (REF. 22)

There are 179 breast cancer samples in this cohort have *PIK3CA* mutation data. The *PIK3CA* mutations of these tumors were detected using Sequenom MassArray that detects activating mutations using primer extension. The c-MYC protein levels for these 179 breast tumor samples were quantified using Reverse-Phase Protein Array (RPPA) technology (REF. 23).
